# Supplementary material for: Linking compound weather extremes to Mediterranean cyclones, fronts, and airstreams
Source: Copernicus journal article supplement (doi:10.5194/wcd-5-1043-2024), 2024-08-19
Supplement: Supplementary file 1 [file wcd-5-1043-2024-supplement.pdf]

Supplement of Weather Clim. Dynam., 5, 1043–1060, 2024  
<https://doi.org/10.5194/wcd-5-1043-2024-supplement>  
© Author(s) 2024. CC BY 4.0 License.

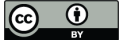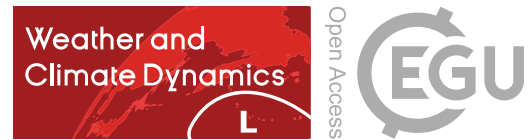

*Supplement of*

## **Linking compound weather extremes to Mediterranean cyclones, fronts, and airstreams**

**Alice Portal et al.**

*Correspondence to:* Alice Portal ([alice.portal@unibe.ch](mailto:alice.portal@unibe.ch))

The copyright of individual parts of the supplement might differ from the article licence.

# Supplement

## List of material

- Threshold maps for extreme-event identification (Fig. SM1);
- Frequency maps of uni-variate extremes (Fig. SM2);
- Conditional frequency maps of compound  $R \wedge W$  extremes, with uni-variate extremes defined based on a 95<sup>th</sup> percentile threshold (Fig. SM3) instead of a 98<sup>th</sup> percentile threshold used in the main manuscript (see Fig. 4);
- Map of cyclone frequency conditioned on the occurrence of uni-variate extremes (Fig. SM4);
- Maps showing the ratio of compound over uni-variate extremes, i.e., the compounding ratio (Figs SM5, SM6);
- Frequency maps of the cyclone features used in the analyses of Figs 6, 8 in the main manuscript (Fig. SM7);
- Maps of the first, second and third dominant cyclone cluster in terms of absolute impact-area frequency (Fig. SM8).

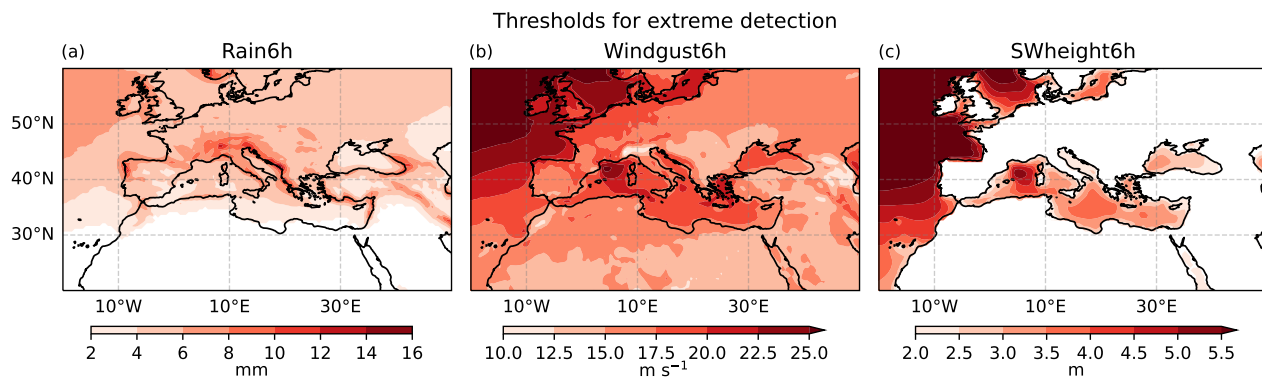

**Figure S1.** Thresholds used for the identification of (a) Rain, (b) Windgust and (c) Swell-Wave height extremes. These are defined as the 98th percentile of the variable distribution at each grid point, provided it exceeds a minimum value of 2 mm,  $10 \text{ m s}^{-1}$  and 2 m, respectively

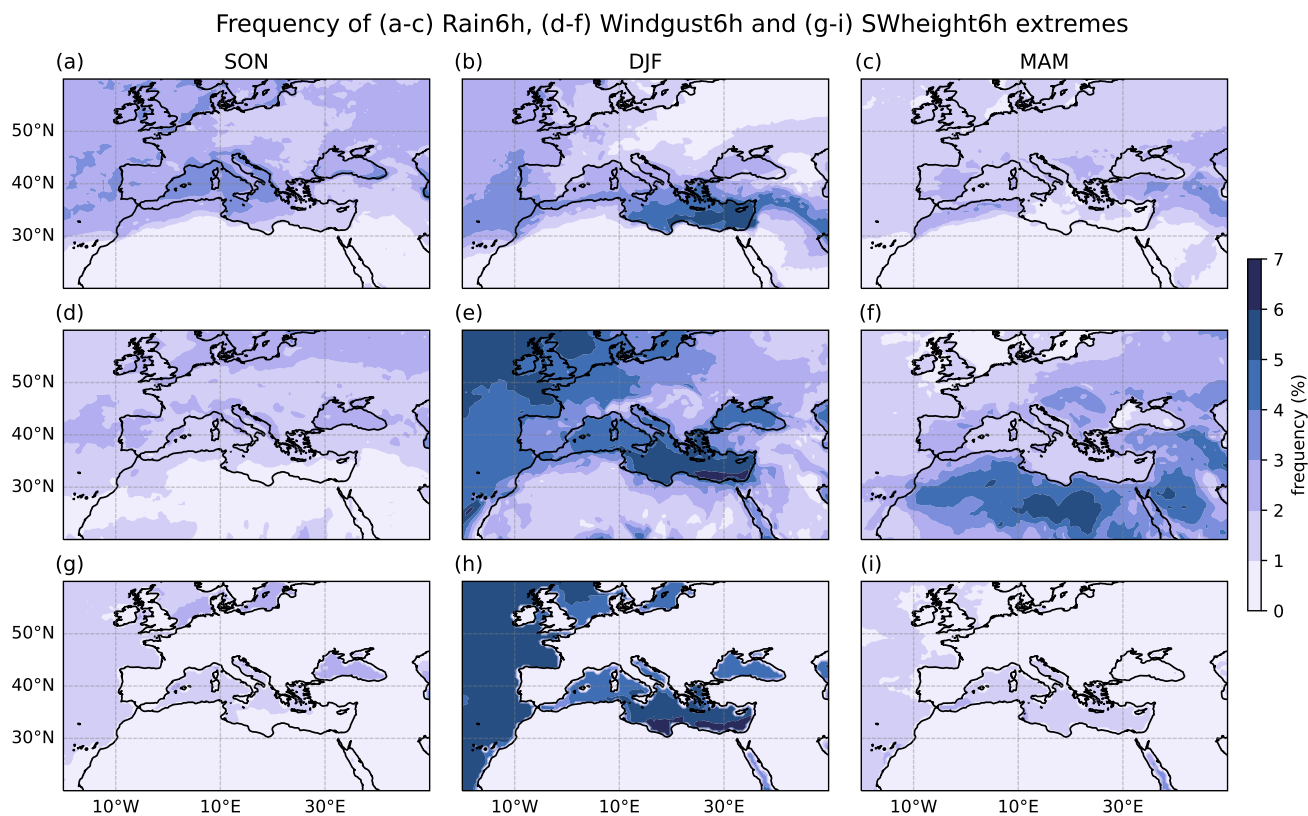

**Figure S2.** Frequency of (a-c) Rain, (d-f) Windgust and (g-i) Swell-Wave height moderate extremes, computed as the percentage of extreme occurrences over the total number of 6-hourly time steps

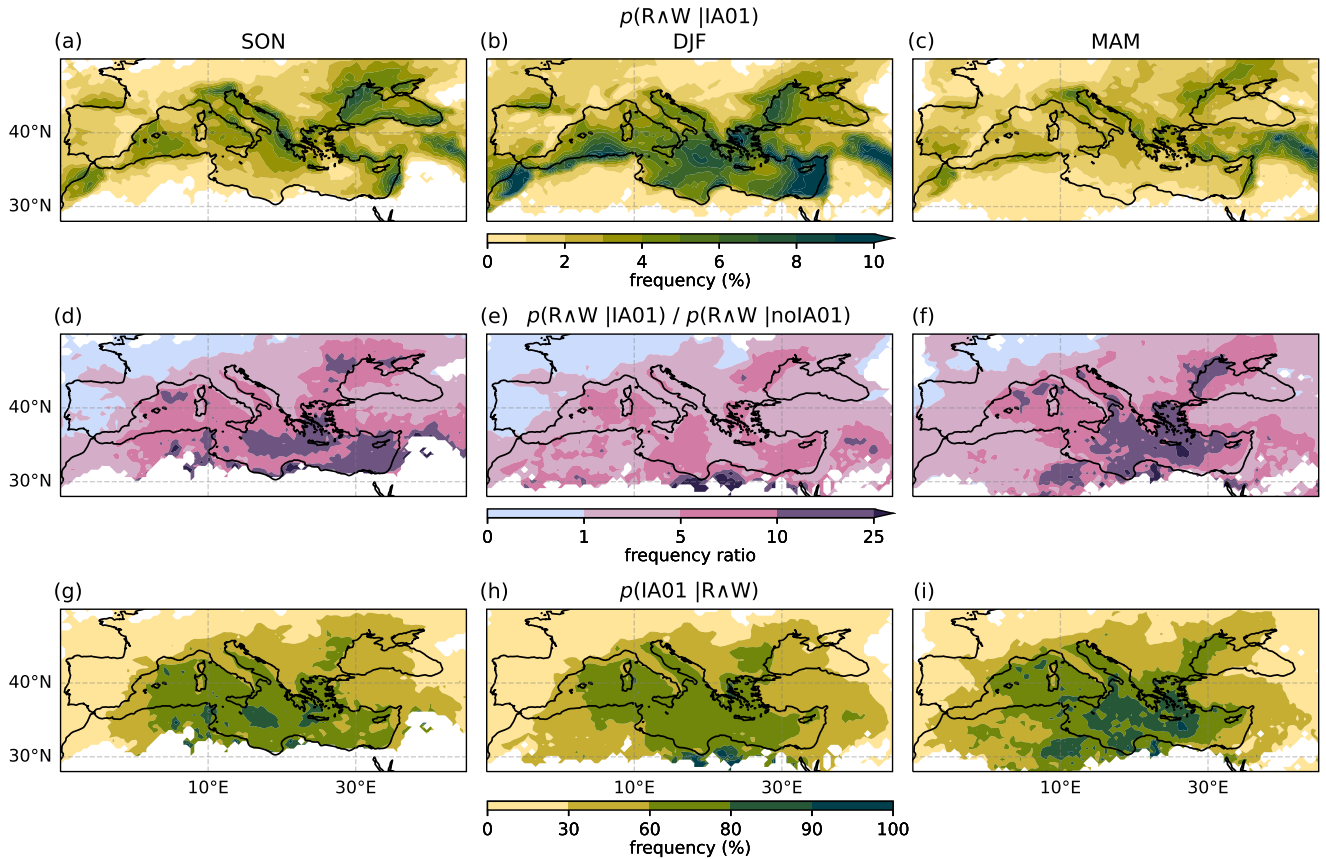

**Figure S3.** As Fig. 4 in the main manuscript, but with extremes defined based on a local 95th percentile threshold. (a-c) The frequency of R<sup>W</sup> compound conditional to the presence of a cyclone, (d-f) the ratio of R<sup>W</sup> compound frequency during cyclone occurrence over the R<sup>W</sup> compound frequency during times when cyclones do not occur, (g-i) the cyclone frequency conditional to the presence of R<sup>W</sup> compounds. Seasonal results for autumn - SON, winter - DJF and spring - MAM are displayed on the left, centre and right panels, respectively. Grid points displaying less than four (R<sup>W</sup> | IA01) events are masked out

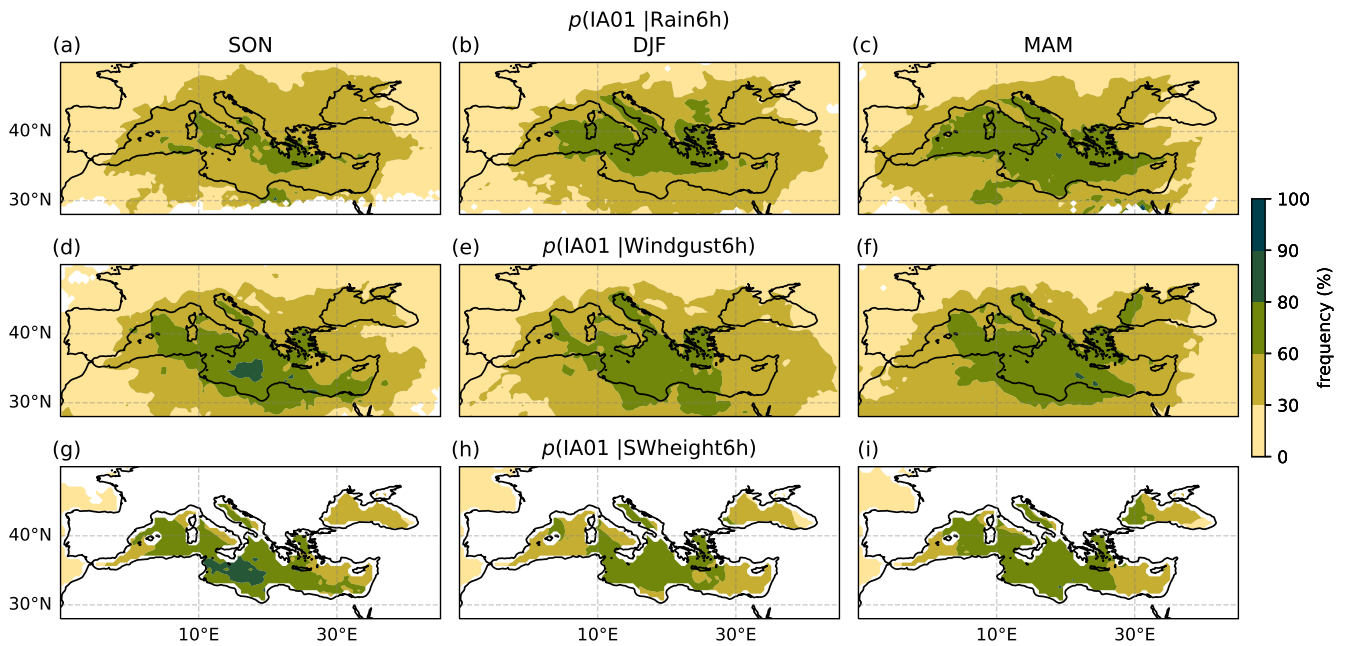

**Figure S4.** Cyclone frequency conditional to the occurrence of (a-c) Rain, (d-f) Windgust, (g-i) Swell-Wave height extremes. Results are shown by season (autumn - SON, winter - DJF, spring - MAM). Grid points displaying less than four (extreme IIA01) events are masked out

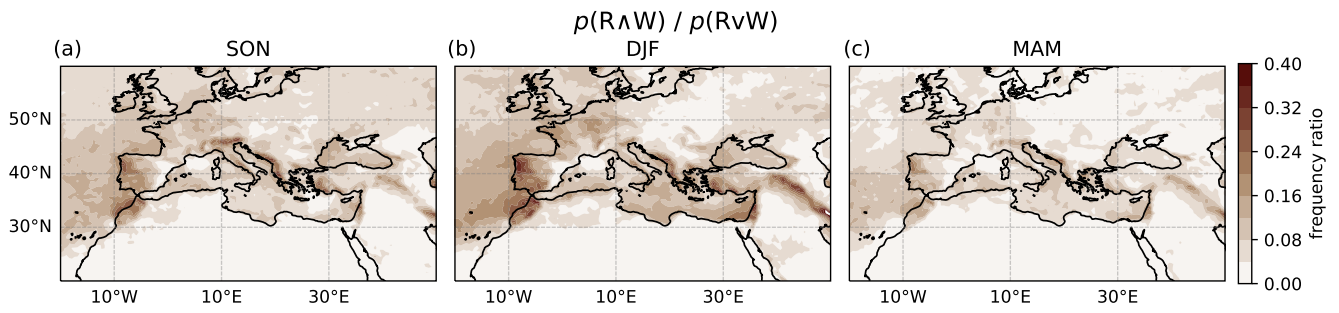

**Figure S5.** Ratio of  $R^{\wedge W}$  over  $R^{\vee W}$  (shading), computed as the number of compound extreme occurrences over the number of uni-variate or compound extreme events

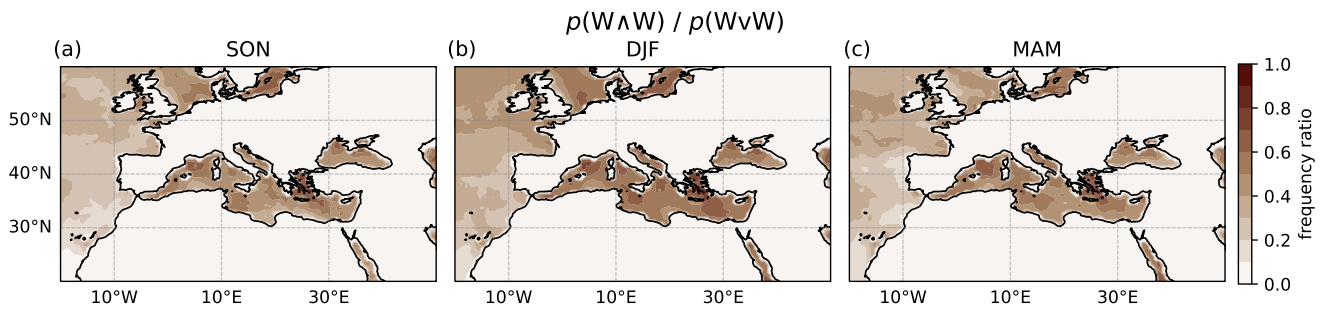

**Figure S6.** As in Fig. SM5 for  $W^{\wedge W}$  compound (note difference in colour scale)

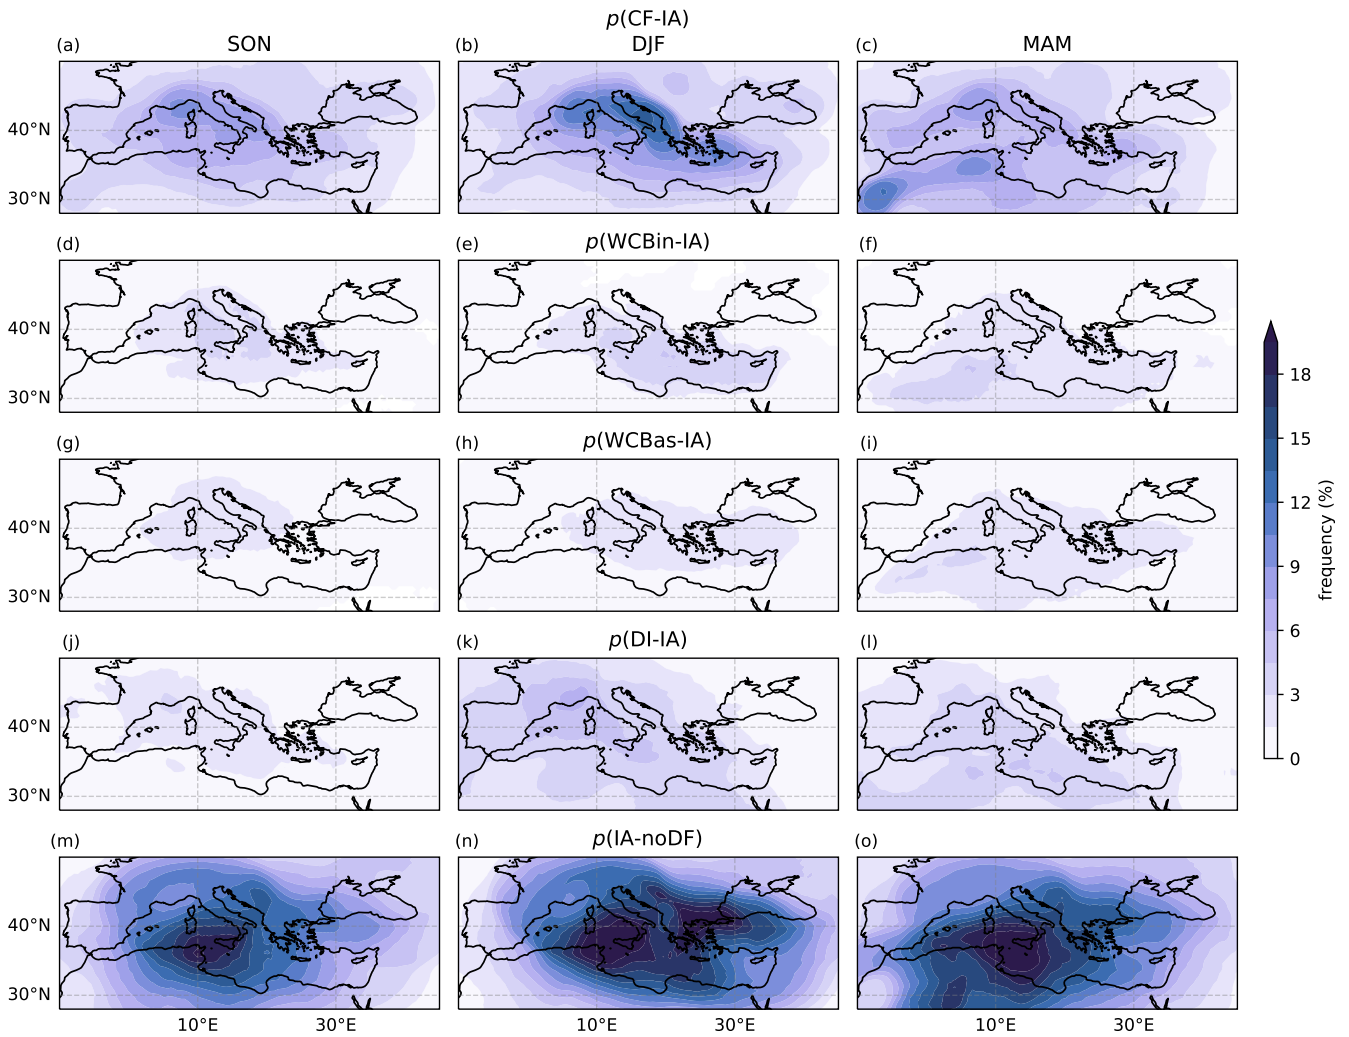

**Figure S7.** Frequency of cyclone features corresponding to cold fronts (a-c, CF-IA), regions of warm conveyor belt inflow (d-f, WCBin-IA) and ascent (g-i, WCBas-IA), dry intrusions (j-l, DI-IA), and the 1000 km radius around the cyclone centre after removal of the aforementioned dynamical features' masks (m-o, IA-noDF), computed as the percentage occurrence per time step

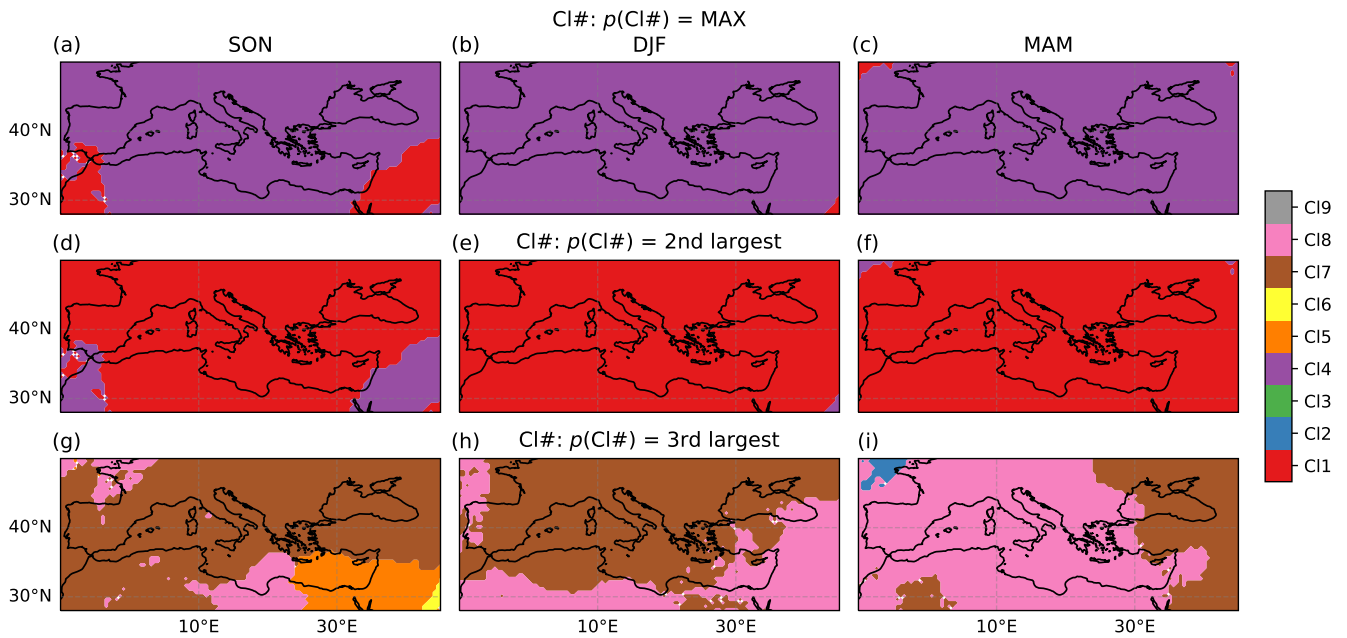

**Figure S8.** The first, second and third cyclone cluster for frequency in (a,d,g) autumn - SON, (b,e,h) winter - DJF and (c,f,i) spring - MAM. Note that grid points simultaneously within the IA01 of multiple cyclones contribute to the frequencies of all the relevant clusters



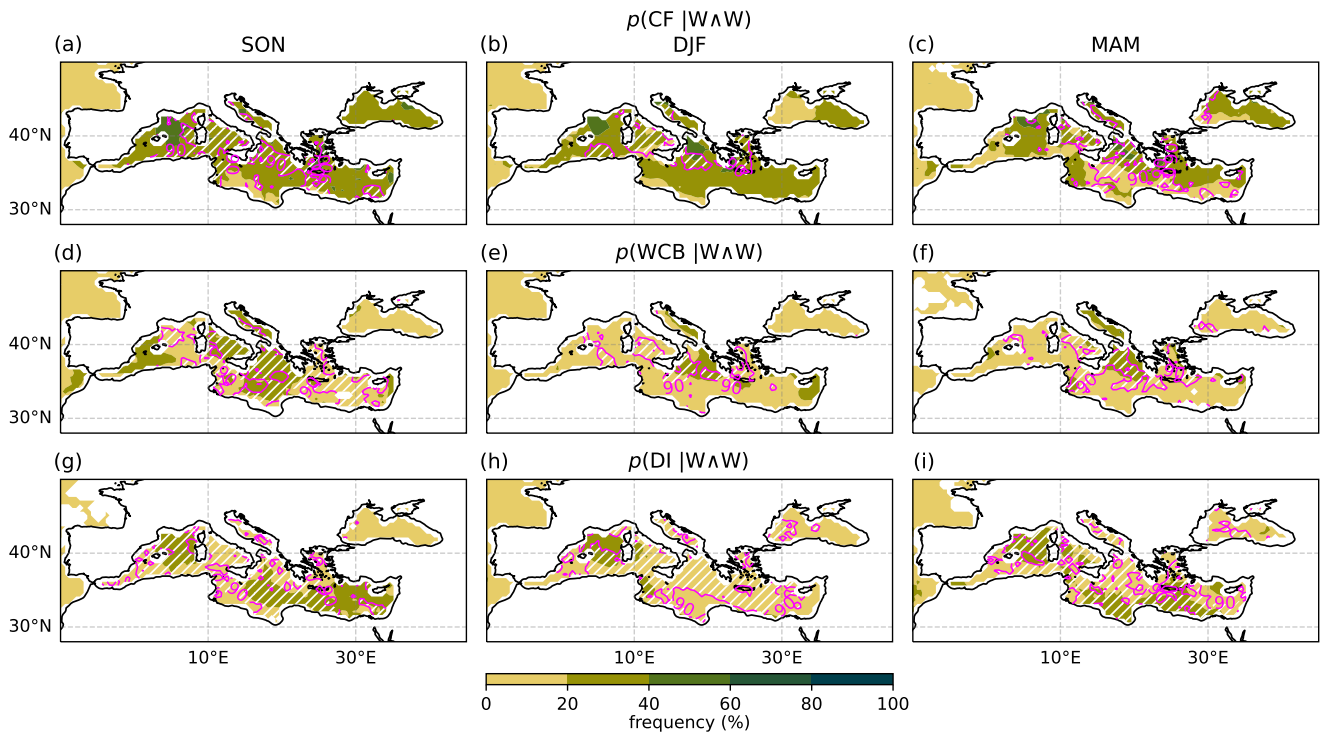

**Figure S9.** Frequency of (a-c) CFs, (d-f) WCBs and (g-i) DIs conditional to W $\wedge$ W compound occurrence. Magenta contours and slanted white hatching identify regions where more than 90% of the selected dynamical features are associated with cyclones, according to the definitions of cyclone impact area in Section 3 of the main manuscript
